# Supplementary material for: Comparative Study of the Immune Microenvironment in Heterotopic Tumor Models
Source: MDPI journal article supplement (doi:10.3390/cancers16020295), 2024-01-10
Supplement: s1 [file s1]

Supplementary Material

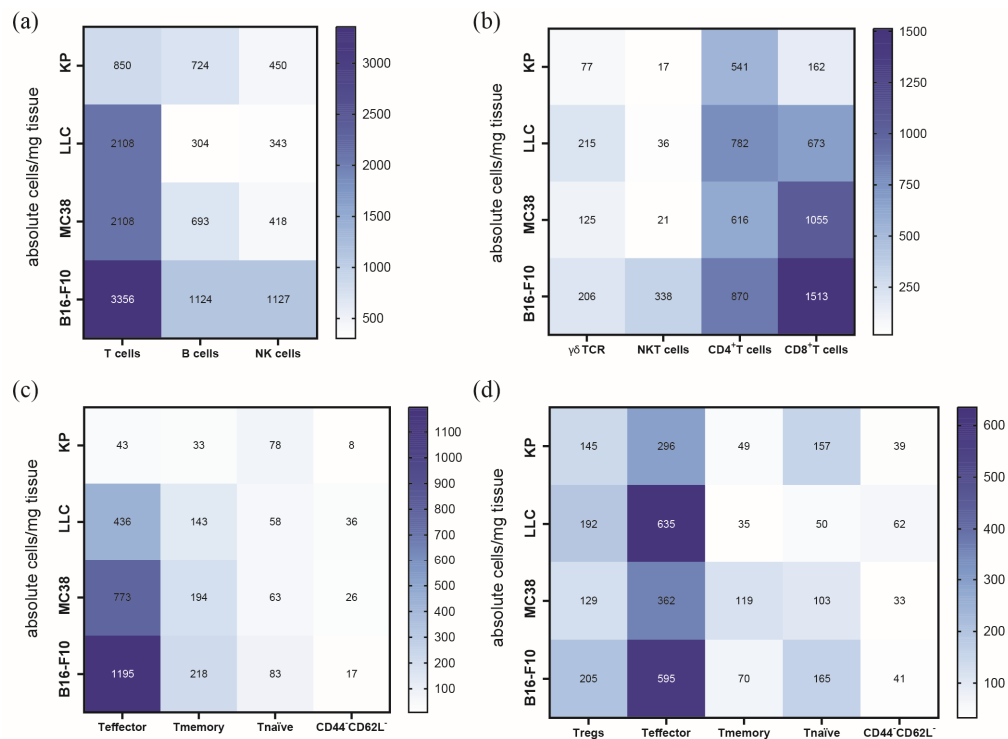

**Supplementary Figure S1. Lymphoid immune composition depicted as absolute cells/mg tumor tissue. (a–d)** Flow cytometric analysis of single-cell suspensions of s.c. tumors of lung cancer cell lines (KP, n=32; LLC, n = 18), colon cancer (MC38, n = 28), and melanoma (B16-F10, n = 17). Data were pooled from 2 to 5 independent experiments. Heatmaps show absolute cells per mg tumor tissue of lymphoid (a), CD3<sup>+</sup> (b), CD8<sup>+</sup> (c), and CD4<sup>+</sup> (d) cells measured in tumors, ranging from the highest (dark blue) to the lowest (white) number, respectively.

**Supplementary Table S1.** Statistical differences of % of lymphoid cells of CD45<sup>+</sup> cells in the tumor microenvironment of indicated cell lines. Significant differences between four experimental groups were determined using one-way ANOVA with Tukey’s post hoc test for corrections of multiple comparisons. \*\*p<0.01; \*\*\*p<0.001; \*\*\*\*p<0.0001; n.s., non-significant; and NK cells, natural killer cells.

| % of CD45 <sup>+</sup> cells | KP vs.<br>LLC | KP vs.<br>MC38 | KP vs.<br>B16-F10 | LLC vs.<br>MC38 | LLC vs.<br>B16-F10 | MC38 vs.<br>B16-F10 |
|------------------------------|---------------|----------------|-------------------|-----------------|--------------------|---------------------|
| CD3 <sup>+</sup> cells       | ****          | ***            | ****              | n.s.            | **                 | ****                |
| B cells                      | n.s.          | n.s.           | n.s.              | n.s.            | n.s.               | n.s.                |
| NK cells                     | n.s.          | n.s.           | n.s.              | n.s.            | n.s.               | n.s.                |

**Supplementary Table S2.** Statistical differences of % of CD3<sup>+</sup> cells in the tumor microenvironment of indicated cell lines. Significant differences between four experimental groups were determined using one-way ANOVA with Tukey's post hoc test for corrections of multiple comparisons. \*p<0.05; \*\*\*p<0.001; \*\*\*\*p<0.0001; n.s., non-significant; and NKT cells, natural killer T cells.

| % of CD3 <sup>+</sup> cells | KP vs.<br>LLC | KP vs.<br>MC38 | KP vs.<br>B16-F10 | LLC vs.<br>MC38 | LLC vs.<br>B16-F10 | MC38 vs.<br>B16-F10 |
|-----------------------------|---------------|----------------|-------------------|-----------------|--------------------|---------------------|
| γδTCR <sup>+</sup> T cells  | n.s.          | ***            | ****              | ***             | ****               | n.s.                |
| NKT cells                   | n.s.          | n.s.           | ****              | n.s.            | ****               | ****                |
| CD4 <sup>+</sup> T cells    | ****          | ****           | ****              | n.s.            | n.s.               | n.s.                |
| CD8 <sup>+</sup> T cells    | ****          | ****           | ****              | ****            | *                  | n.s.                |

**Supplementary Table S3.** Statistical differences of % of CD8<sup>+</sup> cells in the tumor microenvironment of indicated cell lines. Significant differences between four experimental groups were determined using one-way ANOVA with Tukey's post hoc test for corrections of multiple comparisons. \*p<0.05; \*\*\*\*p<0.0001; and n.s., non-significant.

| % of CD8 <sup>+</sup> cells | KP vs.<br>LLC | KP vs.<br>MC38 | KP vs.<br>B16-F10 | LLC vs.<br>MC38 | LLC vs.<br>B16-F10 | MC38 vs.<br>B16-F10 |
|-----------------------------|---------------|----------------|-------------------|-----------------|--------------------|---------------------|
| T effector                  | ****          | ****           | ****              | n.s.            | n.s.               | n.s.                |
| T memory                    | n.s.          | n.s.           | n.s.              | n.s.            | n.s.               | n.s.                |
| T naïve                     | ****          | ****           | ****              | n.s.            | n.s.               | n.s.                |
| CD44-CD62L <sup>-</sup>     | n.s.          | n.s.           | *                 | n.s.            | n.s.               | n.s.                |

**Supplementary Table S4.** Statistical differences of % of CD4<sup>+</sup> cells in the tumor microenvironment of indicated cell lines. Significant differences between four experimental groups were determined using one-way ANOVA with Tukey's post hoc test for corrections of multiple comparisons. \*p<0.05; \*\*p<0.01; \*\*\*\*p<0.0001; n.s., non-significant; and T regs, regulatory T cells

| % of CD4 <sup>+</sup> cells | KP vs.<br>LLC | KP vs.<br>MC38 | KP vs.<br>B16-F10 | LLC vs.<br>MC38 | LLC vs.<br>B16-F10 | MC38 vs.<br>B16-F10 |
|-----------------------------|---------------|----------------|-------------------|-----------------|--------------------|---------------------|
| T regs                      | n.s.          | ****           | n.s.              | **              | n.s.               | ****                |
| T effector                  | ****          | n.s.           | n.s.              | ****            | **                 | n.s.                |
| T memory                    | *             | **             | n.s.              | ****            | ****               | n.s.                |
| T naïve                     | **            | n.s.           | n.s.              | **              | n.s.               | n.s.                |
| CD44-CD62L <sup>-</sup>     | n.s.          | n.s.           | n.s.              | n.s.            | n.s.               | n.s.                |

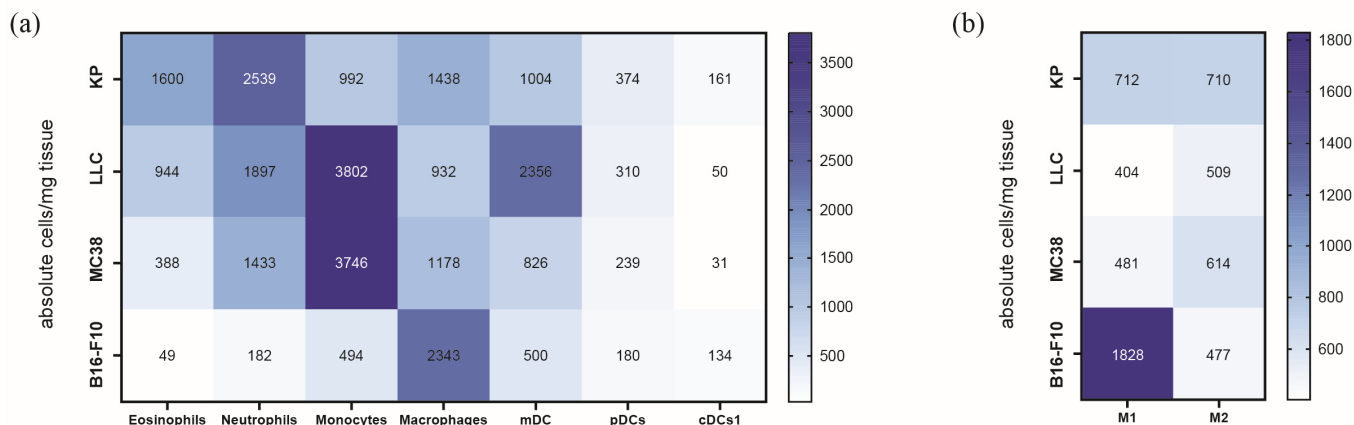

**Supplementary Figure S2. Myeloid immune composition depicted as absolute cells/mg tumor tissue.** (a,b) Flow cytometric analysis of single-cell suspensions of s.c. tumors of lung cancer cell lines (KP, n=30; LLC, n=16), colon cancer (MC38, n=28), and melanoma (B16-F10, n=9). Data were pooled from 1 to 4 independent experiments. Heatmaps show absolute cells per mg tumor tissue of myeloid (a) and total macrophages (b), ranging from the highest (dark blue) to the lowest (white) numbers, respectively.

**Supplementary Table S5.** Statistical differences of % of myeloid cells of CD45<sup>+</sup> cells in the indicated tumor microenvironment of cell lines. Significant differences between four experimental groups were determined using one-way ANOVA with Tukey's post hoc test for corrections of multiple comparisons. \*p<0.05; \*\*p<0.01; \*\*\*p<0.001; \*\*\*\*p<0.0001; n.s., non-significant; mDC, monocyte-derived dendritic cell; pDC, plasmacytoid dendritic cells; and cDCs1, conventional dendritic cells type 1

| % of CD45 <sup>+</sup> cells | KP vs.<br>LLC | KP vs.<br>MC38 | KP vs.<br>B16-F10 | LLC vs.<br>MC38 | LLC vs.<br>B16-F10 | MC38 vs.<br>B16-F10 |
|------------------------------|---------------|----------------|-------------------|-----------------|--------------------|---------------------|
| Eosinophils                  | ****          | ****           | ****              | n.s.            | n.s.               | n.s.                |
| Neutrophils                  | ****          | ****           | ****              | n.s.            | *                  | n.s.                |
| Monocytes                    | ****          | ****           | n.s.              | n.s.            | ****               | ****                |
| Macrophages                  | n.s.          | n.s.           | ****              | n.s.            | ****               | ****                |
| mDCs                         | ****          | *              | n.s.              | *               | ***                | **                  |
| pDCs                         | n.s.          | ****           | n.s.              | *               | n.s.               | **                  |
| cDCs1                        | ***           | ****           | **                | n.s.            | ****               | ****                |

**Supplementary Table S6.** Statistical differences of % macrophages cells in the tumor microenvironment of indicated cell lines. Significant differences between four experimental groups were determined using one-way ANOVA with Tukey's post hoc test for corrections of multiple comparisons. \*\*p<0.01; \*\*\*p<0.001; \*\*\*\*p<0.0001; and n.s., non-significant.

| % macrophages  | KP vs.<br>LLC | KP vs.<br>MC38 | KP vs.<br>B16-F10 | LLC vs.<br>MC38 | LLC vs.<br>B16-F10 | MC38 vs.<br>B16-F10 |
|----------------|---------------|----------------|-------------------|-----------------|--------------------|---------------------|
| M1 macrophages | ****          | n.s.           | n.s.              | ***             | n.s.               | **                  |
| M2 macrophages | n.s.          | n.s.           | n.s.              | n.s.            | n.s.               | n.s.                |
